# Supplementary material for: Unveiling the electrical performance of flash-sintered potassium sodium niobate
Source: Royal Society of Chemistry journal article supplement (doi:10.1039/d4tc01702a), 2024-01-01
Supplement: d4tc01702a1.pdf [file d4tc01702a1.pdf]

## Unveiling the Electrical Performance of Flash-Sintered Potassium Sodium Niobate

Alexander Tkach<sup>1</sup>, Ricardo Serrazina<sup>1</sup>, Luis Pereira<sup>2</sup>, Ana M. O. R. Senos<sup>1</sup>, Paula M. Vilarinho<sup>1\*</sup>

### Supplementary information

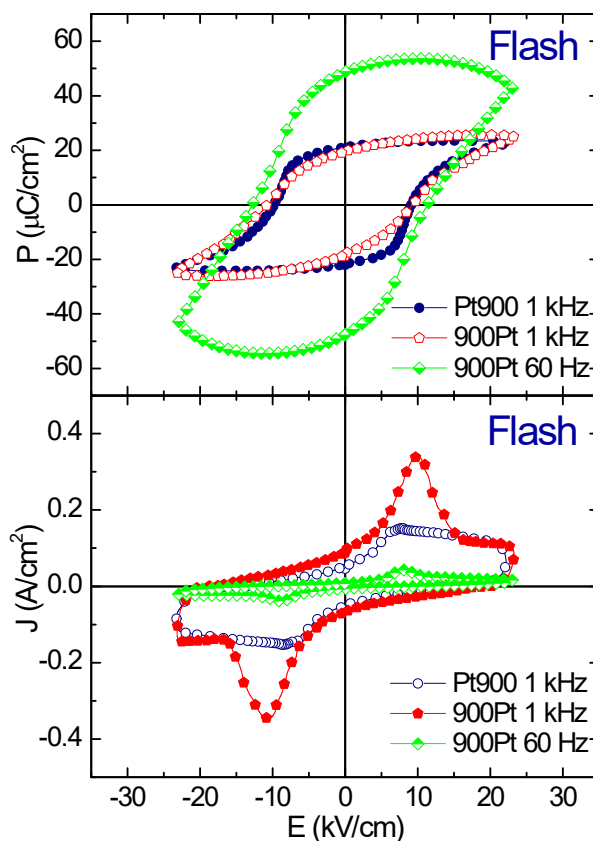

*Figure S1. Polarization,  $P$ , (top) and current density,  $J$ , (bottom) as a function of AC electric field,  $E$ , for Flash sintered KNN ceramics, measured at room temperature. Flash ceramics annealed at 900 °C for 1 h with sputtered Pt electrodes (900Pt, pentagons) exhibit similar polarization compared with that for Flash (circles) ceramics with painted Pt electrodes annealed at 900 °C for 1 h (Pt900, circles) at 1 kHz. Decrease in the measurement frequency to 60 Hz results in significantly rounded loop, indicating higher conductivity contribution.*
